# Supplementary material for: Visualization of Three Sclerotiniaceae Species Pathogenic on Onion Reveals Distinct Biology and Infection Strategies
Source: MDPI journal article supplement (doi:10.3390/ijms22041865), 2021-02-13
Supplement: s1 [file s1]

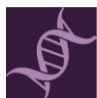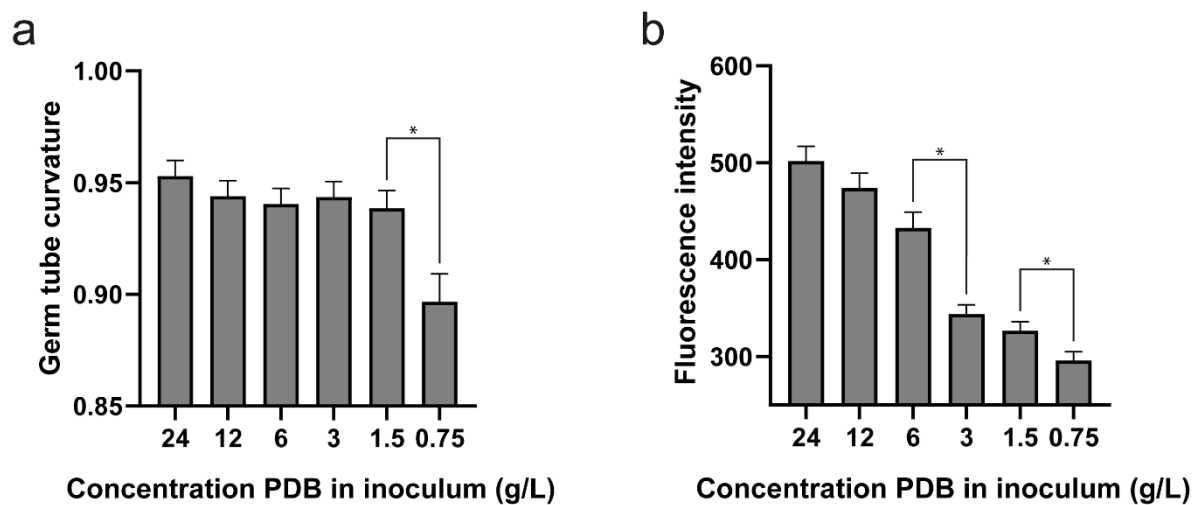

**Figure S1.** The effect of nutrient concentration in the inoculum on (a) curvature and (b) intensity of fluorescence of germ tubes of *B. squamosa* at 8 HPI on the onion leaf surface. Error bars representing standard error, unpaired *t*-test, \*  $p < 0.05$ .

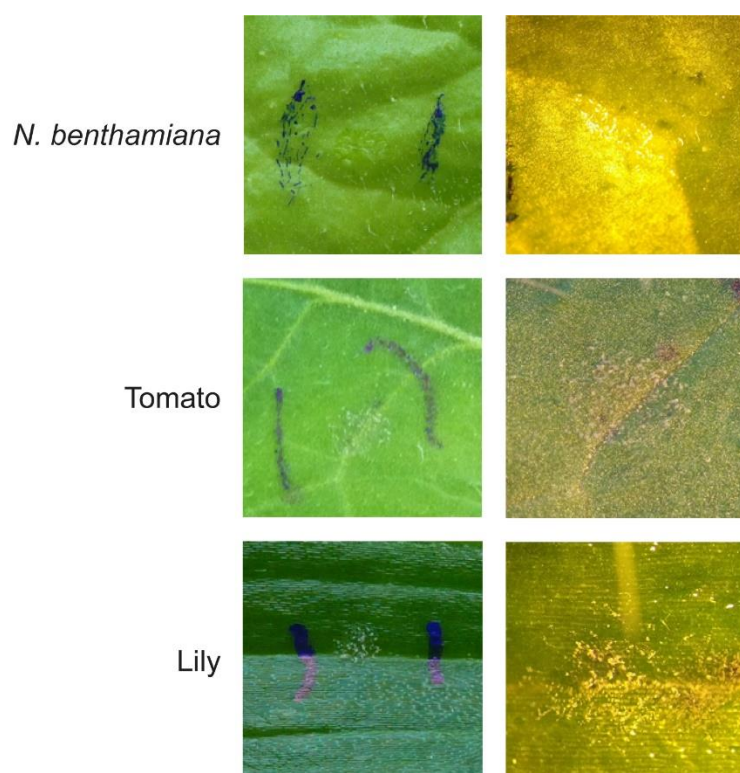

**Figure S2.** Different plant species inoculated with *B. aclada* at 72 HPI. Not only onion but also non-host plants tomato and lily show sporulation.

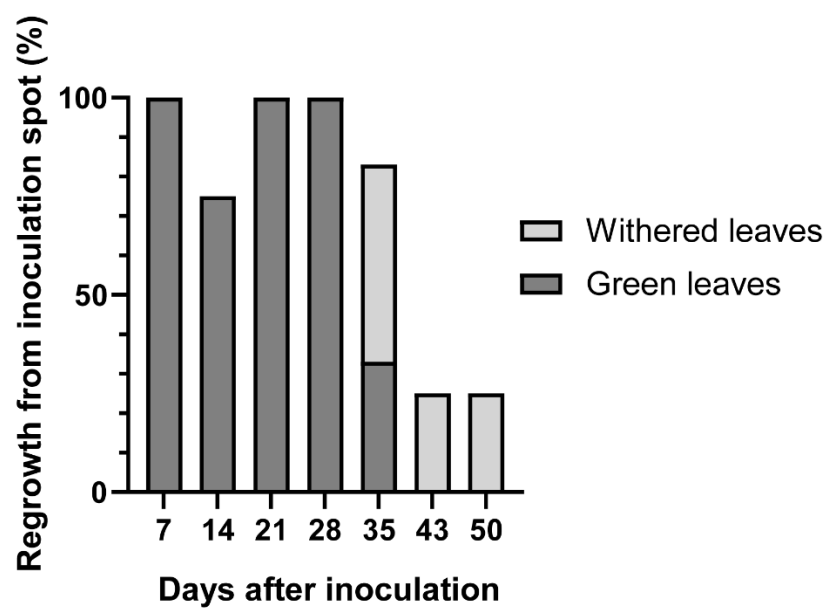

**Figure S3.** *B. aclada* long term infection assay. Regrowth from inoculated leaf segments over time.
